# Supplementary material
Source: ML conference proceedings conference paper supplement (https://proceedings.neurips.cc/paper_files/paper/2022/hash/b4005da5affc3ba527dcb992495ecd20-Abstract.html)
Supplement: Supplementary file 1 [file b4005da5affc3ba527dcb992495ecd20-Supplemental-Datasets_and_Benchmarks.zip]

Archive with 1 entries (1 files):
- FlyView_camera_ready_full_v3_supp_mat.pdf
